# Supplementary material for: Forest Loss in Protected Areas and Intact Forest Landscapes: A Global Analysis
Source: PubMed Central journal article supplement (PMC4605629; doi:10.1371/journal.pone.0138918), 2015-10-14
Supplement: pone.0138918.s001.pdf [file pone.0138918.s001.pdf]

## S1 Appendix: Cross-correlation tables

Table A. Cross-correlation table of socio-economic indices in case of total forest loss.

|                    | pop density | pop density change | gdp change | gdp,ppp / cpt | rural pop | pop growth | corruption | polity    | hdi       | agric of land area | agric change |
|--------------------|-------------|--------------------|------------|---------------|-----------|------------|------------|-----------|-----------|--------------------|--------------|
| pop density        |             |                    |            |               |           |            |            |           |           |                    |              |
| pop density change | 0.055       |                    | -0.254***  | 0.289***      | -0.043    | -0.001     | -0.238**   | 0.138#    | 0.183*    | -0.091             | 0.024        |
| gdp change         |             | 0.065              |            | 0.002         | -0.087    | 0.211**    | -0.082     | 0.134#    | 0.117     | 0.102              | 0.021        |
| gdp,ppp / cpt      |             |                    | -0.131#    |               | 0.101     | 0.027      | 0.418***   | -0.352*** | -0.237**  | 0.141#             | 0.095        |
| rural pop          |             |                    |            | -0.574***     |           | 0.063      | -0.634***  | 0.442***  | 0.833***  | -0.394***          | -0.044       |
| pop growth         |             |                    |            |               | -0.142#   |            | 0.512***   | -0.37***  | -0.663*** | 0.19**             | -0.039       |
| corruption         |             |                    |            |               |           |            | -0.153*    | 0.196*    | 0.201**   | 0.056              | 0.04         |
| polity             |             |                    |            |               |           |            |            | -0.627*** | -0.731*** | 0.186*             | 0.033        |
| hdi                |             |                    |            |               |           |            |            |           | 0.585***  | 0.041              | -0.022       |
| agric of land area |             |                    |            |               |           |            |            |           |           | -0.203**           | 0.008        |
| agric change       |             |                    |            |               |           |            |            |           |           |                    | 0.069        |

Statistical significance:

|     |             |
|-----|-------------|
| #   | $p < 0.1$   |
| *   | $p < 0.05$  |
| **  | $p < 0.01$  |
| *** | $p < 0.001$ |

Table B. Cross-correlation table of socio-economic indices in case of protected forest loss.

|                    | pop density | pop density growth | gdp change | gdp,ppp / cpt | rural pop | pop growth | corruption | polity    | hdi       | agric of land area | agric land growth |
|--------------------|-------------|--------------------|------------|---------------|-----------|------------|------------|-----------|-----------|--------------------|-------------------|
| pop density        |             |                    |            |               |           |            |            |           |           |                    |                   |
| pop density growth | -0.028      |                    | -0.117     | -0.038        | -0.035    | -0.056     | 0.033      | 0.004     | -0.037    | -0.087             | -0.032            |
| gdp change         |             | -0.047             |            | -0.102        | -0.007    | -0.032     | 0.053      | -0.129    | -0.155*   | -0.181*            | -0.006            |
| gdp,ppp / cpt      |             |                    | 0.121      |               | -0.017    | -0.046     | -0.174*    | 0.09      | 0.136#    | -0.156*            | -0.049            |
| rural pop          |             |                    |            | -0.079        |           | 0.085      | -0.665***  | 0.483***  | 0.847***  | -0.296***          | -0.045            |
| pop growth         |             |                    |            |               | -0.032    |            | 0.14#      | -0.007    | -0.116    | 0.095              | -0.008            |
| corruption         |             |                    |            |               |           |            | -0.157*    | 0.19*     | 0.203**   | 0.043              | 0.039             |
| polity             |             |                    |            |               |           |            |            | -0.654*** | -0.739*** | 0.166*             | 0.033             |
| hdi                |             |                    |            |               |           |            |            |           | 0.605***  | -0.004             | -0.026            |
| agric of land area |             |                    |            |               |           |            |            |           |           | -0.197*            | 0.008             |
| agric land growth  |             |                    |            |               |           |            |            |           |           |                    | 0.072             |

Statistical significance:

|     |             |
|-----|-------------|
| #   | $p < 0.1$   |
| *   | $p < 0.05$  |
| **  | $p < 0.01$  |
| *** | $p < 0.001$ |

Table C. Cross-correlation table of socio-economic indices in case of intact forest loss.

|                    | pop density | pop density growth | gdp change | gdp,ppp / cpt | rural pop | pop growth | corruption | polity   | hdi       | agric of land area | agric land growth |
|--------------------|-------------|--------------------|------------|---------------|-----------|------------|------------|----------|-----------|--------------------|-------------------|
| pop density        |             |                    |            |               |           |            |            |          |           |                    |                   |
| pop density growth | 0.011       |                    | -0.144     | 0.076         | -0.183    | -0.043     | 0.217#     | 0.167    | 0.185     | -0.034             | -0.104            |
| gdp change         |             | 0.092              |            | 0.069         | -0.226#   | -0.146     | 0.137      | 0.107    | 0.357**   | 0.013              | -0.095            |
| gdp,ppp / cpt      |             |                    | 0.215#     |               | -0.162    | -0.096     | 0.249#     | 0.301*   | 0.353**   | -0.1               | 0.065             |
| rural pop          |             |                    |            | -0.337**      |           | -0.082     | 0.607***   | 0.308*   | 0.687***  | -0.293*            | -0.09             |
| pop growth         |             |                    |            |               | 0.132     |            | -0.359**   | -0.325*  | -0.643*** | -0.062             | 0.322*            |
| corruption         |             |                    |            |               |           |            | -0.091     | -0.195   | -0.182    | 0.198              | 0.495***          |
| polity             |             |                    |            |               |           |            |            | 0.445*** | 0.784***  | -0.258*            | -0.103            |
| hdi                |             |                    |            |               |           |            |            |          | 0.501***  | -0.101             | -0.165            |
| agric of land area |             |                    |            |               |           |            |            |          |           | -0.119             | -0.135            |
| agric land growth  |             |                    |            |               |           |            |            |          |           |                    | 0.266*            |

Statistical significance:

|     |             |
|-----|-------------|
| #   | $p < 0.1$   |
| *   | $p < 0.05$  |
| **  | $p < 0.01$  |
| *** | $p < 0.001$ |

*Table D. Cross-correlation table of socio-economic indices in case of protected intact forest loss.*

|                    | pop density | pop density growth | gdp change | gdp.ppp / cpt | rural pop | pop growth | corruption | polity | hdi | agric of land area | agric land growth |
|--------------------|-------------|--------------------|------------|---------------|-----------|------------|------------|--------|-----|--------------------|-------------------|
| pop density        |             |                    |            |               |           |            |            |        |     |                    |                   |
| pop density growth | 0.005       |                    |            |               |           |            |            |        |     |                    |                   |
| gdp change         | 0.224#      | 0.068              |            |               |           |            |            |        |     |                    |                   |
| gdp.ppp / cpt      | 0.071       | 0.06               | -0.088     |               |           |            |            |        |     |                    |                   |
| rural pop          | -0.214      | 0.005              | -0.007     | -0.309*       |           |            |            |        |     |                    |                   |
| pop growth         | 0.005       | -0.068             | 0.626***   | 0.253#        | 0.685***  |            |            |        |     |                    |                   |
| corruption         | -0.07       | 0.047              | -0.088     | 0.003         | -0.157    |            |            |        |     |                    |                   |
| polity             |             |                    | -0.075     | -0.102        | -0.157    |            |            |        |     |                    |                   |
| hdi                |             |                    |            | 0.418**       | 0.811***  |            |            |        |     |                    |                   |
| agric of land area |             |                    |            |               |           |            |            |        |     |                    |                   |
| agric land growth  |             |                    |            |               |           |            |            |        |     |                    |                   |

Statistical significance:

- #  $p < 0.1$
- \*  $p < 0.05$
- \*\*  $p < 0.01$
- \*\*\*  $p < 0.001$
