# Supplementary material for: Forest Loss in Protected Areas and Intact Forest Landscapes: A Global Analysis
Source: PubMed Central journal article supplement (PMC4605629; doi:10.1371/journal.pone.0138918), 2015-10-14
Supplement: pone.0138918.s002.pdf [file pone.0138918.s002.pdf]

## 1 *S2 Appendix: Comparison of our findings to previous studies: forest extent and* 2 *loss*

3 Comparison of our findings to the findings of earlier studies reveals that all studies show  
4 relatively consistent values for global forest extent, deforestation and protection status of  
5 forests. The global forest extent was estimated to be 40.9 million (year 2000) and  
6 39 million km<sup>2</sup> (year 2005) by FAO [1] and Schmitt et al. [2], respectively. This corresponds  
7 rather well to our estimate of 42.6 million km<sup>2</sup> for the year 2000. The estimate of FAO [1] is  
8 based on country reports while the estimate of Schmitt et al. [2] is based updated Global  
9 Forest Map (GFM) with 10% tree cover threshold. Our estimate is based on the GFC data from  
10 Hansen et al. [3] with 20% canopy cover threshold (Table 4).

11 Around 13% of the global forest is under protection according to FAO [1] and Schmitt et al.  
12 [2]. Our results, indicate a somewhat larger share of the world's forests are under some form  
13 of protection, reaching 19% (Table 4). The protection estimate of FAO [1] is based on country  
14 reports and the estimate of Schmitt et al. [2] is based on updated GFM data, WDPA data on  
15 IUCN protection category I-VI protected areas from the year 2008 with a 10% tree cover  
16 threshold. Our results are rather close to those in the previous literature, if only the IUCN  
17 protection category I-VI areas are taken into account as this resulted in protection share of  
18 11.5% of the global forest extent. If only the IUCN protection categories I-IV are included,  
19 our results indicate 7.0% protection, while Schmitt et al. [2] report a share of 7.7%.

20 The global extent of IFLs (i.e. intact forest landscapes) and primary forests has been  
21 estimated by Potapov et al. [4] and FAO [1], respectively. Potapov et al. [4] report the extent  
22 of IFL to be 13.1 million km<sup>2</sup> in the year 2000 while FAO [1] report that the extent of primary  
23 forest at 14.7 million km<sup>2</sup>. Using the Potapov et al. [4] IFL areas in combination with the  
24 Hansen et al. [3] forest extent, we estimated the intact forest extent in the year 2000 to be  
25 somewhat smaller than reported elsewhere, 10.7 million km<sup>2</sup> (Table 4). Forest cover estimate  
26 of Potapov et al. [4] is based on tree cover canopy dataset from MODIS 2005 (resolution of  
27 500 m) and 20% canopy cover threshold.

28 Potapov et al. [4] report that 18.9% of the intact forest is protected whereas our estimate  
29 was 34% (Table 4). Both studies, our and Potapov et al. [4], used the same dataset for the  
30 definition of intact forest landscape. The difference may originate from the different estimates  
31 of the extent of intact forest (see above) and from the different selection of categories of  
32 protection status. Potapov et al. [4] included only the IUCN protection categories I-VI from  
33 the WDPA data, whereas our study included more liberally all authority reported protected  
34 areas (also including IUCN protection categories I-VI) from the WDPA data for the year 2010.

35 The global forest loss was estimated by FAO [1] to be 1.43 million km<sup>2</sup> over the period 2000-  
36 2010 while Hansen et al. [3] reported that over the period 2000-2012 around 2.3 million km<sup>2</sup>  
37 forest was lost (gross loss). Our assessment, based on data from Hansen et al. [3] and using  
38 20% canopy cover threshold, revealed that forest loss rate over the period 2000-2012 was  
39 2.1 million km<sup>2</sup>. The forest loss estimates of FAO [1] are based on country reports, while the  
40 estimates of Hansen et al. [3], and thus ours, are based on Landsat data with 30 m  
41 resolution.

42 FAO [1] further reported that during the period 2000-2010 approximately 400,000 km<sup>2</sup> of  
43 primary forest was lost whereas our assessment reveals that 269,000 km<sup>2</sup> of intact forest  
44 area was lost during the period 2000-2012 (Table 4). FAO [1] used country reports for the  
45 primary forest area estimates where the definition of primary forest might differ from country

1 to country, whereas we used globally coherent data [3,4]. Therefore, our results provide more  
2 comparable results among different countries.

3

#### 4 **References**

5 1. FAO (2010) Global forest resource assessment 2010. Rome: Food and Agriculture Organisation  
6 of the United Nations.

7 2. Schmitt CB, Burgess ND, Coad L, Belokurov A, Besançon C, et al. (2009) Global analysis of the  
8 protection status of the world's forests. *Biological Conservation* 142: 2122-2130.

9 3. Hansen MC, Potapov PV, Moore R, Hancher M, Turubanova SA, et al. (2013) High-resolution  
10 global maps of the 21st-century forest cover change. *Science* 342: 850-853.

11 4. Potapov P, Yaroshenko A, Turubanova S, al. e (2008) Mapping the world's intact forest  
12 landscapes by remote sensing. *Ecology and Society* 13.

13

14
