# Supplementary material for: Forest Loss in Protected Areas and Intact Forest Landscapes: A Global Analysis
Source: PLoS One. 2015 Oct 14;10(10):e0138918. doi: 10.1371/journal.pone.0138918 (PMC4605629; doi:10.1371/journal.pone.0138918)
Supplement: S1 Table — Socio-economic data used in the WLS regression analysis. (XLSX) [file pone.0138918.s004.xlsx]

## Sheet: metadata
	Online supplement 1
	Heino et al. Loss of protected and intact forest: a global analysis
	Submitted to PLOS ONE
	Socio-economic indicators at national level
	Metadata is presented below, the data itself on the next sheet
	Variable	Abbreviation	Data type	Time period	Reference
	Population density	pop density	per square km	2010	UN [38]
	Population density growth	pop density change	%	2000 - 2010	UN [38]
	GDP growth	gdp change	%	2000 - 2010	World Bank [39]
	GDP per capita (PPP)	gdp,ppp / cpt	International USD	2010	World Bank [39]
	Rural population of total population	rural pop	%	2010	World Bank [39]
	Population growth	pop growth	%	2000 - 2010	World Bank [39]
	Corruption perception index	corruption	0 .. 10	2010	Transparency International [40]
	Polity index	polity	-10 .. 10	2010	Marshall and Gurr [41]
	Human Development Index (HDI)	hdi	0 .. 1	2012	UNDP [42]
	Agriculture of total land area	agric of land area	%	2010	World Bank [39]
	Agricultural land area growth	agric change	%	2000 - 2010	World Bank [39]

## Sheet: socio-economic indicator values
		pop density	pop density change	gdp change	gdp,ppp / cpt	rural pop	pop growth	corruption	polity	hdi	agric of land area	agric change
	Country	per square km	%	%	International USD	%	%	0 .. 10	-10 .. 10	0 .. 1	%	%
1	Afghanistan	48.171	37.4312	-999	1637.3	76.761	37.8845	1.4	-999	0.374	58.1237	0.240713
2	Aland	-999	-999	-999	-999	-999	-999	-999	-999	-999	-999	-999
3	Albania	111.461	4.31051	221.652	8866.3	47.678	-4.68404	3.3	9	0.749	43.8431	2.09124
4	Algeria	14.892	16.1622	194.227	12518.4	27.976	16.8457	2.9	2	0.713	17.3709	0.567652
5	American Samoa	343.819	18.7331	-999	-999	7.02243	-3.27875	-999	-999	-999	24.5	0.5
6	Andorra	181.333	31.2989	-999	-999	12.1825	19.1257	-999	-999	0.846	42.766	2.76596
7	Angola	15.306	37.0155	803.336	7047.05	41.621	40.3894	1.9	-2	0.508	46.8356	0.874308
8	Anguilla	168.769	38.7606	-999	-999	-999	-999	-999	-999	-999	-999	-999
9	Antarctica	-999	-999	-999	-999	-999	-999	-999	-999	-999	-999	-999
10	Antigua and Barbuda	200.701	14.2346	47.4595	20176.7	70.118	12.3442	-999	-999	0.76	20.4545	0
11	Argentina	14.535	9.42558	29.7436	-999	7.651	9.40615	2.9	8	0.811	53.6111	6.65293
12	Armenia	103.761	0.519254	384.436	6507.91	35.934	-3.66055	2.6	5	0.729	60.9199	14.4663
13	Aruba	597.156	19.0726	31.7196	-999	53.223	11.8195	-999	-999	-999	11.1111	0
14	Australia	2.877	16.1955	174.993	41168.2	10.954	15.0305	8.7	10	0.938	51.8829	-7.40924
15	Austria	100.094	4.85878	96.6358	41787.2	32.546	4.72074	7.9	10	0.895	38.406	-2.70983
16	Azerbaijan	106.094	13.2793	903.411	15950.3	46.599	12.4957	2.4	-7	0.734	57.6703	0.283988
17	Bahamas	24.707	15.1949	24.6625	22630.1	15.936	21.0704	-999	-999	0.794	1.4985	0.1998
18	Bahrain	1818.21	97.7201	183.715	40553.2	11.382	87.2852	4.9	-5	0.796	11	-1.95775
19	Bangladesh	1032.6	14.7384	112.96	2134.5	72.106	14.1575	2.4	5	0.515	70.9918	-1.22148
20	Barbados	635.653	2.17547	42.1285	15335.1	56.111	4.94255	7.8	-999	0.825	32.5581	-9.30233
21	Belarus	46.221	-4.59668	333.552	15709.6	25.385	-5.14743	2.5	-7	0.793	43.8541	-1.75819
22	Belgium	350.893	5.27116	102.495	39693.8	2.544	6.28544	7.1	8	0.897	44.8481	-1.0568
23	Belize	13.569	24.3949	68.0673	8223.42	55.0369	29.3433	-999	-999	0.702	6.88295	0.350723
24	Benin	78.58	35.7801	178.002	1633.48	55.742	36.8441	2.8	7	0.436	30.0639	1.72934
25	Bermuda	1225.3	3.3533	65.059	56395	0	5.3224	-999	-999	-999	14.8	-5.2
26	Bhutan	15.446	27.0753	260.99	6526.46	65.2069	27.038	5.7	3	0.538	13.5438	0.31924
27	Bolivia	9.039	19.5319	133.985	5278.89	33.601	19.5559	2.8	7	0.675	34.1226	-0.0313856
28	Bosnia and Herzegovina	73.445	1.7991	204.677	9101.06	52.267	0.301615	3.2	-999	0.735	42.0392	0.27451
29	Botswana	3.45	14.1628	137.491	13296	39.023	12.1892	5.8	8	0.634	45.632	-0.158806
30	Bouvet Island	-999	-999	-999	-999	-999	-999	-999	-999	-999	-999	-999
31	Brazil	22.897	11.7636	232.407	14043.4	15.665	11.8651	3.7	8	0.73	32.3215	1.42031
32	British Indian Ocean Territory	-999	-999	-999	-999	-999	-999	-999	-999	-999	-999	-999
33	British Virgin Islands	153.94	13.3955	-999	-999	-999	-999	-999	-999	-999	-999	-999
34	Brunei	69.197	21.9803	106.122	70060.7	24.403	20.7257	5.5	-999	0.855	2.16319	0.265655
35	Bulgaria	67.57	-6.3933	269.878	15151.3	27.476	-9.4805	3.6	9	0.782	46.5365	-3.92
36	Burkina Faso	60.105	33.9566	252.717	1417.7	74.333	33.8763	3.1	0	0.343	44.0972	8.42471
37	Burundi	301.173	31.5091	132.843	725.294	89.358	38.3332	1.8	6	0.355	88.3956	0
38	Cape Verde	122.985	13.4391	175.202	5974.76	38.1671	10.2107	5.1	10	0.586	18.6104	0.992556
39	Cambodia	78.097	13.589	207.667	2513.06	80.186	17.525	2.1	2	0.543	32.036	5.0136
40	Cameroon	41.222	25.0061	142.192	2465.28	48.488	29.4872	2.2	-4	0.495	20.3084	0.930803
41	Canada	3.412	10.9233	117.547	39779.4	19.446	10.5155	8.9	10	0.911	6.95756	-0.477747
42	Cayman Islands	212.992	39.8925	-999	-999	0	33.163	-999	-999	-999	11.25	0
43	Central African Republic	7.064	18.8825	117.169	890.649	61.151	19.5586	2.1	-1	0.352	8.15435	-0.110758
44	Chad	8.744	36.5397	669.477	1952.53	78.261	41.1946	1.7	-2	0.34	39.3361	0.716328
45	Chile	22.618	10.9814	174.247	19229.7	11.058	10.9765	7.2	10	0.819	21.1733	0.851342
46	China	139.767	5.69033	394.84	9230.42	50.774	5.94466	3.5	-7	0.699	55.6207	-0.66847
47	Christmas Island	-999	-999	-999	-999	-999	-999	-999	-999	-999	-999	-999
48	Cocos Islands	-999	-999	-999	-999	-999	-999	-999	-999	-999	-999	-999
49	Colombia	40.648	16.4232	187.327	10801.2	24.98	16.4089	3.5	7	0.719	38.3082	-2.12348
50	Comoros	394.815	30.6296	169.132	1490.19	72.03	29.295	2.1	9	0.429	83.2886	5.37346
51	Cook Islands	85.966	13.7854	-999	-999	-999	-999	-999	-999	-999	-999	-999
52	Costa Rica	91.172	18.8745	127.626	12269.9	35.814	18.834	5.3	10	0.773	36.8194	0.783392
53	Cote d'Ivoire	61.21	19.0347	120.031	2753.05	49.443	17.6381	2.2	0	0.432	64.4654	2.83019
54	Croatia	77.883	-2.26754	173.605	19840.1	42.463	-0.185269	4.1	9	0.805	23.8349	2.92628
55	Cuba	101.55	1.38373	110.462	18290.9	24.785	1.28701	3.7	-7	0.78	61.7249	0.700707
56	Cyprus	119.3	16.9986	148.337	31908.7	29.689	17.0042	6.3	10	0.848	12.3377	-3.0303
57	Czech Republic	133.048	2.44154	237.502	26618.9	26.536	2.13891	4.6	8	0.873	54.8162	-0.574033
58	Denmark	128.792	3.94499	95.6343	41558.3	13.205	3.89667	9.3	10	0.901	61.8902	-0.494933
59	Germany	230.525	-0.0563612	75.1716	39668.5	26.185	-0.52861	7.9	10	0.92	47.91	-1.00242
60	Djibouti	38.307	21.4206	-999	-999	23.001	15.3757	3.2	2	0.445	73.4254	4.3572
61	Dominica	90.222	-2.74867	45.4249	9897.9	32.9394	2.13551	5.2	-999	0.745	34.6667	6.66667
62	Ecuador	51.011	17.1697	268.376	9019.32	33.137	19.6918	2.5	5	0.724	30.1888	-2.28821
63	Egypt	81.004	19.9153	119.242	10620.8	56.625	18.0522	3.1	-3	0.662	3.68778	0.381737
64	El Salvador	294.33	4.25404	63.074	7236.96	35.72	4.35325	3.6	8	0.68	73.8098	1.41602
65	Ireland	63.608	17.5119	115.128	42187.7	38.102	19.8409	8	10	0.916	66.3086	2.26448
66	Iceland	3.108	13.8462	44.4689	37340.5	6.37591	13.0993	8.5	-999	0.906	15.8703	-2.97257
67	Isle of Man	144.876	7.89821	-999	-999	49.4083	9.35604	-999	-999	-999	76.1404	-0.701754
68	Israel	334.992	23.3325	85.4951	29378	8.177	21.2212	6.1	10	0.9	23.9094	-2.24584
69	Italy	200.953	6.25463	86.1719	33842.7	31.78	6.21908	3.9	10	0.881	48.6938	-4.47336
70	Equatorial Guinea	24.969	34.5965	886.558	36849.4	60.663	34.3487	1.9	-5	0.554	10.8378	-1.06952
71	Eritrea	44.674	43.2456	199.707	1083.24	79.1	45.7388	2.6	-7	0.351	75.1683	0.613861
72	Spain	91.063	14.3677	138.624	31828.6	22.716	15.681	6.1	10	0.885	55.2225	-4.42877
73	Estonia	29.737	-2.16161	235.548	21126.4	30.539	-3.07799	6.5	9	0.846	22.3874	-0.872847
74	Ethiopia	75.115	26.4903	224.898	1061.51	83.243	31.9142	2.7	1	0.396	34.985	4.323
75	Falkland Islands	0.248	4.64135	-999	-999	-999	-999	-999	-999	-999	-999	-999
76	Fiji	47.095	6.02445	91.5015	7365.99	48.163	6.02627	-999	-4	0.702	23.4045	-0.0218938
77	Faroe Islands	34.816	6.48072	-999	-999	59.073	6.64645	-999	-999	-999	2.149	0
78	France	113.848	6.33242	93.3931	35713.8	14.771	6.76425	6.8	9	0.893	53.221	-1.01972
79	French Polynesia	67.691	13.9387	-999	-999	48.58	12.9803	-999	-999	-999	12.1585	0.409836
80	French Southern Territories	-999	-999	-999	-999	-999	-999	-999	-999	-999	-999	-999
81	Gabon	5.624	21.8635	186.255	16693.2	14.162	26.9839	2.8	3	0.683	20.0256	0
82	Gambia	153.023	33.2523	21.5722	1655.49	43.344	36.7638	3.2	-5	0.439	60.7708	6.2253
83	Georgia	62.443	-8.29074	280.651	5952	47.258	0.780843	3.8	6	0.745	35.5231	-7.64858
84	Ghana	102.258	27.2705	545.699	3065.01	48.785	28.8864	4.1	8	0.558	69.4383	6.02092
85	Gibraltar	4874	6.93287	-999	-999	-999	-999	-999	-999	-999	-999	-999
86	Grenada	303.741	2.92049	49.7549	11690.5	61.1873	3.00827	-999	-999	0.77	32.3529	-2.94118
87	Guadeloupe	270.185	7.8303	-999	-999	-999	-999	-999	-999	-999	-999	-999
88	Guam	327.679	15.9519	-999	-999	6.82577	2.6473	-999	-999	-999	33.3333	-3.7037
89	Guatemala	132.143	28.048	114.292	6849.09	50.672	28.002	3.2	8	0.581	41.0134	-0.653229
90	Guernsey	-999	-999	-999	-999	-999	-999	-999	-999	-999	-999	-999
91	Guinea	40.599	19.6199	58.1097	1185.45	65.032	24.3525	2	5	0.355	57.9521	3.05632
92	Guinea-Bissau	41.944	22.1326	130.861	1248.14	56.78	24.6061	2.1	6	0.364	57.9659	0.0711238
93	Guyana	3.51	2.93255	217.018	5542.06	71.689	5.59525	2.7	6	0.636	8.51918	-0.15748
94	French Guiana	2.568	40.0982	-999	-999	-999	-999	-999	-999	-999	-999	-999
95	Haiti	360.117	15.5907	81.0499	1490.86	48.01	15.3664	2.2	0	0.456	64.2235	2.90276
96	Heard Island and McDonald Islands	-999	-999	-999	-999	-999	-999	-999	-999	-999	-999	-999
97	Greece	86.084	3.39054	136.479	28639.9	38.781	3.57244	3.5	10	0.86	63.2428	-2.92475
98	Honduras	67.809	22.2312	121.372	4270.05	48.423	22.2216	2.4	7	0.632	28.7783	2.54714
99	Hong Kong	6417.82	3.97846	33.2197	48132	0	5.38935	8.4	-999	0.906	0	-999
100	Hungary	107.314	-2.22226	174.877	21997.7	31.035	-2.0659	4.7	10	0.831	59.0191	-6.30113
101	India	372.533	16.1987	258.46	4638.07	69.07	15.6739	3.3	9	0.554	60.46	-0.946458
102	Indonesia	125.945	12.4067	329.758	8030.24	50.076	15.19	2.8	8	0.629	30.1396	4.92556
103	Iran	44.882	13.2097	317.201	15704.9	31.062	12.9739	2.2	-7	0.742	29.926	-8.68748
104	Iraq	72.257	32.7522	-999	12767	33.464	30.0877	1.5	3	0.59	18.9031	-0.0739546
105	Jamaica	249.391	6.17488	46.5595	8370.45	48.008	3.91733	3.3	9	0.73	41.4589	-2.77008
106	Jersey	-999	-999	-999	-999	-999	-999	-999	-999	-999	-999	-999
107	Jordan	69.253	28.1775	212.433	11253.5	17.527	26.0371	4.7	-3	0.7	11.2897	-0.824982
108	Greenland	0.026	0	-999	-999	15.6173	1.25445	-999	-999	-999	0.574735	0.000243635
109	Kazakhstan	5.881	7.14156	709.384	19601.1	46.268	9.66132	2.9	-6	0.754	77.2919	0.7023
110	Kenya	69.805	29.6238	153.422	2038.83	76.429	30.7628	2.1	8	0.519	48.2307	1.36873
111	Kiribati	137.116	18.4936	122.819	1729.37	56.1933	18.0642	3.2	-999	0.629	41.9753	0
112	Kuwait	153.594	41.0115	217.977	81036.8	1.758	56.9369	4.5	-7	0.79	8.52974	0.224467
113	Kyrgyzstan	26.684	7.65321	250.032	2790.17	64.696	11.2179	2	4	0.622	55.3279	-0.532325
114	Laos	26.186	16.6206	314.825	3900.75	66.879	18.6967	2.1	-7	0.543	10.3033	2.34835
115	Latvia	34.862	-5.57166	206.517	18621.8	32.284	-11.404	4.3	8	0.814	29.0006	3.46845
116	Lebanon	406.5	12.9672	115.085	16111.8	12.864	34.1756	2.5	7	0.745	62.5611	4.39883
117	Lesotho	71.531	10.5631	185.767	2242.21	73.153	8.22616	3.5	8	0.461	76.614	-0.263505
118	Liberia	35.864	40.2801	144.336	688.528	52.199	36.8615	3.3	6	0.388	27.3048	0.415282
119	Libya	3.612	21.4934	-999	-999	22.437	16.7001	2.2	-7	0.769	8.85743	0.0767246
120	Liechtenstein	225.2	9.67657	-999	-999	85.5509	9.14695	-999	-999	0.883	40.625	-3.125
121	Lithuania	50.898	-5.03927	217.524	20670.2	32.999	-11.4945	5	10	0.818	44.2329	-10.298
122	Luxembourg	196.229	16.5235	156.831	89146.8	14.814	16.1937	8.5	-999	0.875	50.5946	1.17375
123	Macao	20909.8	25.8851	364.776	98732.9	0	23.7827	5	-999	-999	0	-999
124	Macedonia	80.137	2.56223	160.356	11433.2	40.811	2.44073	4.1	9	0.74	44.3695	-4.19514
125	Madagascar	35.285	34.8197	127.895	1387.48	68.07	33.8824	2.6	0	0.483	71.1817	1.53902
126	Malawi	125.762	32.7023	209.641	736.392	84.457	32.6123	3.4	6	0.418	59.1854	9.12176
127	Malaysia	86.104	21.2954	163.925	20389.5	27.994	20.7298	4.4	6	0.769	23.9537	-0.0608735
128	Maldives	1060.02	15.6089	241.819	10578	60.006	19.4134	2.3	-999	0.688	23.3333	-6.66667
129	Mali	12.393	36.0672	288.951	1668.07	65.723	36.3077	2.7	7	0.344	33.6185	1.92347
130	Malta	1318.09	4.80472	106.292	27949.6	5.32897	8.69119	5.6	-999	0.847	32.1875	4.0625
131	Marshall Islands	298.552	3.63007	47.1096	3441.37	28.4676	0.511877	-999	-999	-999	72.2222	0
132	Martinique	368.252	5.31084	-999	-999	-999	-999	-999	-999	-999	-999	-999
133	Mauritania	3.374	30.9274	183.799	2763.44	58.77	33.2826	2.3	-2	0.467	38.5282	-0.0378384
134	Mauritius	636.849	8.62392	112.072	15230.1	58.221	7.92427	5.4	10	0.737	44.8276	-4.92611
135	Mayotte	545.759	37.2167	-999	-999	-999	-999	-999	-999	-999	-999	-999
136	Mexico	57.922	13.468	51.315	15335.2	22.175	13.4902	3.1	8	0.775	52.9756	-1.44963
137	Micronesia	158.211	3.69868	26.1081	3337.15	77.4858	-3.54743	-999	-999	0.645	31.4286	-0.714286
138	Moldova	105.547	-12.9997	351.066	3925.03	53.064	-2.13065	2.9	8	0.66	75.0289	-2.34335
139	Monaco	23763.1	0.799975	102.086	-999	0	14.8499	-999	-999	-999	0	-999
140	Mongolia	1.759	14.295	445.376	6475.44	32.433	13.1499	2.7	10	0.675	73.1147	-10.8667
141	Montenegro	45.72	-0.176852	318.05	13697.1	36.9041	1.45322	3.7	9	0.791	38.0669	-999
142	Montserrat	58.176	20.3401	-999	-999	-999	-999	-999	-999	-999	-999	-999
143	Morocco	71.552	10.9695	145.19	6419.23	43.324	10.2133	3.4	-6	0.591	-999	-999
144	Nepal	203.555	22.7818	191.403	2010.78	83.344	15.7946	2.2	6	0.463	29.7105	0.237182
145	New Caledonia	13.506	18.3595	-999	-999	38.1008	17.2405	-999	-999	-999	13.7309	0.382932
146	New Zealand	16.146	13.2179	175.573	31143.6	13.806	13.2229	9.3	10	0.919	43.3254	-15.2102
147	Nicaragua	44.524	14.0822	68.1171	3946.34	42.748	14.1404	2.5	9	0.599	42.7622	0.432109
148	Niger	12.243	42.0137	217.987	841.565	82.384	44.6225	2.6	3	0.304	34.5638	5.35407
149	Nigeria	171.497	28.0822	689.789	5147.55	50.999	29.974	2.4	4	0.471	83.6655	4.77618
150	Japan	334.864	0.648923	16.1519	34561.5	9.459	0.457523	7.8	10	0.912	12.6008	-1.82442
151	Niue	5.646	-22.7422	-999	-999	-999	-999	-999	-999	-999	-999	-999
152	Norfolk Island	-999	-999	-999	-999	-999	-999	-999	-999	-999	-999	-999
153	Norway	12.678	8.7307	150.306	61874.6	20.898	8.86858	8.6	10	0.955	3.30649	-0.117986
154	North Korea	201.98	6.34276	-999	-999	39.79	7.26917	-999	-10	-999	21.2192	0.0415248
155	Northern Mariana Islands	131.287	-10.9816	-999	-999	8.65392	-21.2964	-999	-999	-999	6.52174	0
156	Oman	8.99	22.8814	196.021	49962.6	26.812	27.8323	5.3	-8	0.731	5.72019	2.25331
157	Pakistan	218.056	20.1152	139.893	4219.96	64.118	20.383	2.3	6	0.515	34.2466	-0.71347
158	Palau	44.601	6.78015	24.0735	13030.6	16.6341	6.75915	-999	-999	0.791	10.8696	0
159	Palestina	-999	-999	-999	-999	25.867	30.421	-999	-999	0.67	41.2625	-20.5316
160	Panama	46.57	18.9679	128.816	14034.6	25.389	20.4044	3.6	9	0.78	30.4009	0.403551
161	Papua New Guinea	14.818	27.5105	169.216	2114.24	87.568	27.508	2.1	4	0.466	2.62774	0.408515
162	Paraguay	15.869	20.7962	144.368	7246.92	38.626	20.7367	2.2	8	0.669	52.8316	1.6738
163	Peru	22.624	12.4286	195.757	10460	23.089	12.549	3.5	9	0.741	16.7734	0.222656
164	Philippines	310.869	20.6321	146.327	5613.69	51.352	20.3375	2.4	8	0.654	40.2455	2.73669
165	Pitcairn Islands	-999	-999	-999	-999	-999	-999	-999	-999	-999	-999	-999
166	Poland	118.412	-0.0675151	174.257	21012.2	39.055	-0.702334	5.3	10	0.821	48.0079	-12.4895
167	Portugal	116.062	3.28374	95.175	26116.4	39.494	2.75223	6	10	0.816	40.199	-1.65895
168	Puerto Rico	422.424	-1.71295	57.4459	33354.7	1.22699	-2.34601	5.8	-999	-999	21.4205	-6.4487
169	Qatar	159.89	197.619	616.966	130567	1.34502	194.717	7.7	-10	0.834	5.68475	0
170	Republic of Congo	11.821	28.9235	272.926	5533.19	36.777	31.5242	2.1	-4	0.534	30.9224	0.0585652
171	Mozambique	29.18	28.5123	115.18	886.058	69.042	31.1434	2.7	5	0.327	62.8195	1.58956
172	Myanmar	70.891	6.68483	-999	-999	67.917	7.17857	1.4	-6	0.498	19.1746	2.63085
173	Namibia	2.77	20.4348	183.117	8536.06	62.182	14.8062	4.4	6	0.608	47.1389	-0.013361
174	Nauru	488.333	2.13116	-999	-999	-999	-999	-999	-999	-999	-999	-999
175	Netherlands	400.043	4.72906	101.82	42944.2	17.253	4.33192	8.8	10	0.921	56.5876	-1.35078
176	Netherlands Antilles	250.861	11.6372	-999	-999	-999	-999	-999	-999	-999	-999	-999
177	Dominican Republic	204.641	15.542	115.648	10411.8	30.927	15.6217	3	8	0.702	50.6416	-1.40728
178	Reunion	337.079	14.4907	-999	-999	-999	-999	-999	-999	-999	-999	-999
179	Romania	90.131	-3.1776	341.742	16644.4	47.208	-9.78525	3.7	9	0.786	61.5344	-3.14275
180	Russia	8.372	-2.59453	487.165	21663	26.348	-2.67527	2.1	4	0.788	13.0538	-0.202892
181	Rwanda	403.372	31.1873	224.191	1247.15	81.19	29.0767	4	-4	0.434	77.8273	10.1338
182	Saint Helena	33.754	-18.6003	-999	-999	-999	-999	-999	-999	-999	-999	-999
183	Saint Kitts and Nevis	200.774	13.7124	62.1717	19579.2	68.0604	14.9482	-999	-999	0.745	21.9231	-14.6154
184	Saint Pierre and Miquelon	24.983	-3.57405	-999	-999	-999	-999	-999	-999	-999	-999	-999
185	South Africa	41.058	12.0028	173.365	11606.4	38.454	15.672	4.5	9	0.629	79.8712	-1.01724
186	South Georgia and the South Sandwich Islands	-999	-999	-999	-999	-999	-999	-999	-999	-999	-999	-999
187	South Korea	484.072	4.77499	90.2738	28212.8	17.067	5.1103	5.4	8	0.909	18.2595	-1.72427
188	Spratly islands	-999	-999	-999	-999	-999	-999	-999	-999	-999	-999	-999
189	Sri Lanka	317.939	11.2823	203.522	7572.75	84.959	8.11957	3.2	4	0.715	41.7796	4.30553
190	Sudan	17.38	27.3913	429.072	3162.43	66.916	28.5693	1.6	-2	0.414	57.3422	1.96549
191	Switzerland	185.649	6.92589	115.057	50963.1	26.362	8.91755	8.7	10	0.913	38.0875	-0.2125
192	Finland	15.865	3.69959	94.3501	37754.5	16.442	3.61545	9.2	10	0.892	7.53866	0.256744
193	Suriname	3.203	12.386	389.597	14127	30.674	12.4911	-999	5	0.684	0.5	-0.0641026
194	Svalbard and Jan Mayen	-999	-999	-999	-999	-999	-999	-999	-999	-999	-999	-999
195	Sweden	20.845	5.86055	87.213	40880.4	14.944	5.70346	9.2	10	0.916	7.51816	-0.165716
196	Swaziland	68.305	11.4874	142.117	6174.19	78.684	12.168	3.2	-9	0.536	71.0465	-0.0581395
197	Syria	110.22	27.6566	-999	-999	44.327	31.5275	2.5	-7	0.648	75.7393	1.13375
198	Taiwan	-999	-999	-999	-999	-999	-999	5.8	10	-999	-999	-999
199	Tajikistan	48.069	11.4359	555.653	2110.29	73.5	23.2968	2.1	-3	0.622	34.6099	1.93627
200	Tanzania	47.447	31.7387	124.97	1545.2	73.721	32.1947	2.7	-1	0.476	42.1088	3.72545
201	Thailand	134.711	9.44817	159.855	12821.7	66.27	6.51061	3.5	4	0.69	41.2222	2.39973
202	Democratic Republic of the Congo	28.132	32.9238	205.177	416.174	66.273	32.4647	2	5	0.304	11.3628	0.0705763
203	East Timor	75.592	35.4501	166.867	1705.84	72.04	33.8475	2.5	7	0.576	24.5461	1.88299
204	Togo	106.151	25.749	145.157	1223.73	62.467	29.6266	2.4	-2	0.459	68.0272	1.287
205	Tokelau	94.583	-26.8686	-999	-999	-999	-999	-999	-999	-999	-999	-999
206	Tonga	160.089	6.25212	95.7407	4981.62	76.6316	6.26365	3	-999	0.71	43.0556	1.38889
207	Trinidad and Tobago	261.494	3.8239	153.456	29321	86.556	4.74101	3.6	10	0.76	10.5263	-2.53411
208	Tunisia	64.06	10.8362	106.665	10678.5	33.902	10.3059	4.3	-4	0.712	64.6112	3.13465
209	Turkey	92.848	14.3406	174.281	16757.5	29.513	14.1878	4.4	7	0.722	50.6893	-1.90611
210	Turkmenistan	10.33	12.0147	662.501	10031.6	51.59	12.009	1.6	-9	0.698	69.4997	0.595833
211	Turks and Caicos Islands	89.195	103.219	-999	-999	6.74346	64.1926	-999	-999	-999	1.05263	0
212	Tuvalu	377.962	4.33186	131.59	3221.92	49.8524	4.33167	-999	-999	-999	60	-6.66667
213	Uganda	138.67	38.0433	158.846	1294	84.842	40.0054	2.5	-1	0.456	70.3769	7.75737
214	Ukraine	75.283	-7.04311	336.379	7856.85	31.315	-6.72108	2.4	6	0.74	71.2335	-0.236235
215	United Arab Emirates	89.853	147.624	175.473	57380	15.958	178.934	6.3	-8	0.818	4.75239	-1.85048
216	United Kingdom	255.396	5.37008	53.0208	34696.2	20.492	6.54642	7.6	10	0.875	71.1941	1.07469
217	United States	32.234	9.87116	45.3716	49307.4	17.857	9.62701	7.1	10	0.937	44.9234	-0.307208
218	United States Minor Outlying Islands	-999	-999	-999	-999	-999	-999	-999	-999	-999	-999	-999
219	Uruguay	19.248	1.49757	70.2046	16337.6	7.54699	1.54	6.9	10	0.792	82.0592	-3.40533
220	Uzbekistan	61.343	10.7734	185.841	4185.14	63.796	15.8699	1.6	-9	0.654	62.6587	-1.57499
221	Vanuatu	19.661	29.485	157.635	2920.23	75.4108	27.6892	3.6	-999	0.626	15.3404	0.984413
222	Vatican City	1040.91	-41.8043	-999	-999	-999	-999	-999	-999	-999	-999	-999
223	Venezuela	31.774	19.0216	236.163	16536.3	6.686	18.993	2	-3	0.748	24.0916	-0.16439
224	Vietnam	264.852	11.5425	244.624	4486.26	69.607	11.9818	2.7	-7	0.617	34.7276	6.50158
225	Virgin Islands, U.S.	314.282	0.502059	-999	-999	4.71924	-2.18338	-999	-999	-999	11.4286	-8.57143
226	Wallis and Futuna	67.83	-6.43493	-999	-999	-999	-999	-999	-999	-999	-999	-999
227	Western Sahara	1.994	68.27	-999	-999	-999	-999	-999	-999	-999	-999	-999
228	Yemen	45.557	35.7115	222.142	4671.47	68.258	29.907	2.2	-2	0.458	44.6597	-0.170464
229	Zambia	17.391	28.2995	397.616	2779.43	61.275	30.8485	3	7	0.448	31.9281	1.664
230	Zimbabwe	32.172	0.496673	11.1115	1215.7	61.87	4.58527	2.4	1	0.397	42.1869	3.25708
231	Kosovo	-999	-999	210.989	7862.32	-999	4.45176	2.8	8	-999	-999	-999
232	Saint Vincent and the Grenadines	281.786	1.33635	69.7741	10032.7	51.0822	1.31514	-999	-999	0.733	25.641	0
233	Samoa	64.67	3.69931	138.7	4801.97	79.9219	6.53728	4.1	-999	0.702	12.3675	-4.59364
234	San Marino	516.951	16.9355	-999	-999	5.91037	14.4314	-999	-999	-999	16.6667	0
235	Saint Lucia	323.315	10.9215	58.1322	10263.4	81.6739	13.0284	-999	-999	0.725	18.0328	-8.19672
236	Sao Tome and Principe	171.574	17.2947	162.078	2743.45	38.012	27.828	3	-999	0.525	50.5208	-0.520833
237	Saudi Arabia	12.768	36.9223	179.562	46181.1	17.916	35.3137	4.7	-10	0.782	80.6419	-0.200029
238	Senegal	63.205	30.8023	176.357	2181.69	57.748	31.3221	2.9	7	0.47	49.3689	3.8955
239	Serbia	111.545	-2.73709	508.109	11490.2	43.967	-2.99228	3.5	8	0.769	57.7407	-999
240	Seychelles	190.149	9.95466	57.7506	20527.2	46.7651	10.6482	4.8	-999	0.806	6.52174	-2.17391
241	Sierra Leone	81.789	41.6211	305.028	1349.31	61.124	38.9448	2.4	7	0.359	47.9615	8.72661
242	Singapore	7447.17	29.7787	145.681	70197.2	0	26.0384	9.3	-2	0.895	1.05714	-0.733902
243	Slovakia	111.397	1.05961	203.152	24428	45.166	0.0502531	4.3	10	0.84	40.4379	-10.2897
244	Slovenia	100.201	2.22923	134.783	28018.4	50.041	2.99951	6.4	10	0.892	23.997	-1.72294
245	Solomon Islands	18.624	31.6649	55.9696	1810.37	79.9949	27.6743	2.8	8	0.53	3.25116	0.535906
246	Somalia	14.633	26.1139	-999	-999	62.711	30.4757	1.1	0	-999	70.343	0.09883
